# Supplementary material for: Comprehensive Assessment of Host Responses to Ionizing Radiation by Nuclear Factor-κB Bioluminescence Imaging-Guided Transcriptomic Analysis
Source: PLOS journal article supplement (doi:10.1371/journal.pone.0023682), 2011-08-24

**Figure S1.** NF- B-dependent bioluminescence in living mice. Transgenic mice were exposed to ionizing radiation and imaged in dorsal (A) and ventral positions (B) at 0 h, 1 h, and 3 h. The color overlay on the image represents the photons/sec emitted from the animal, as indicated by color scale. Photos from three independent mice each group were shown.

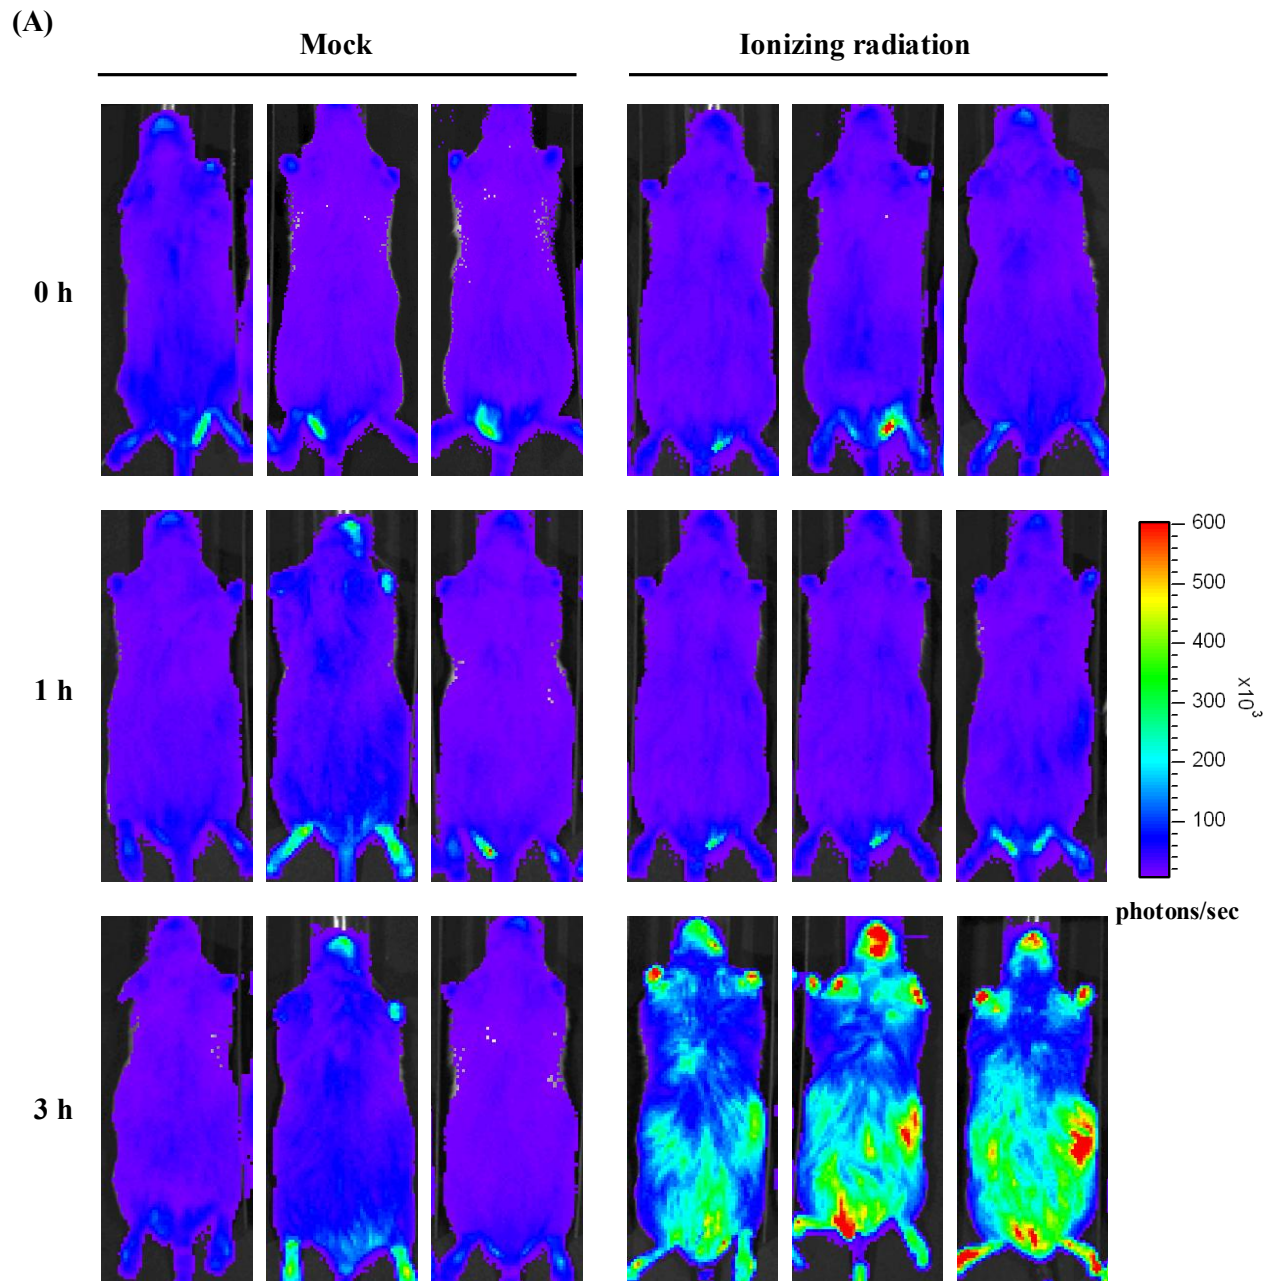

(B)

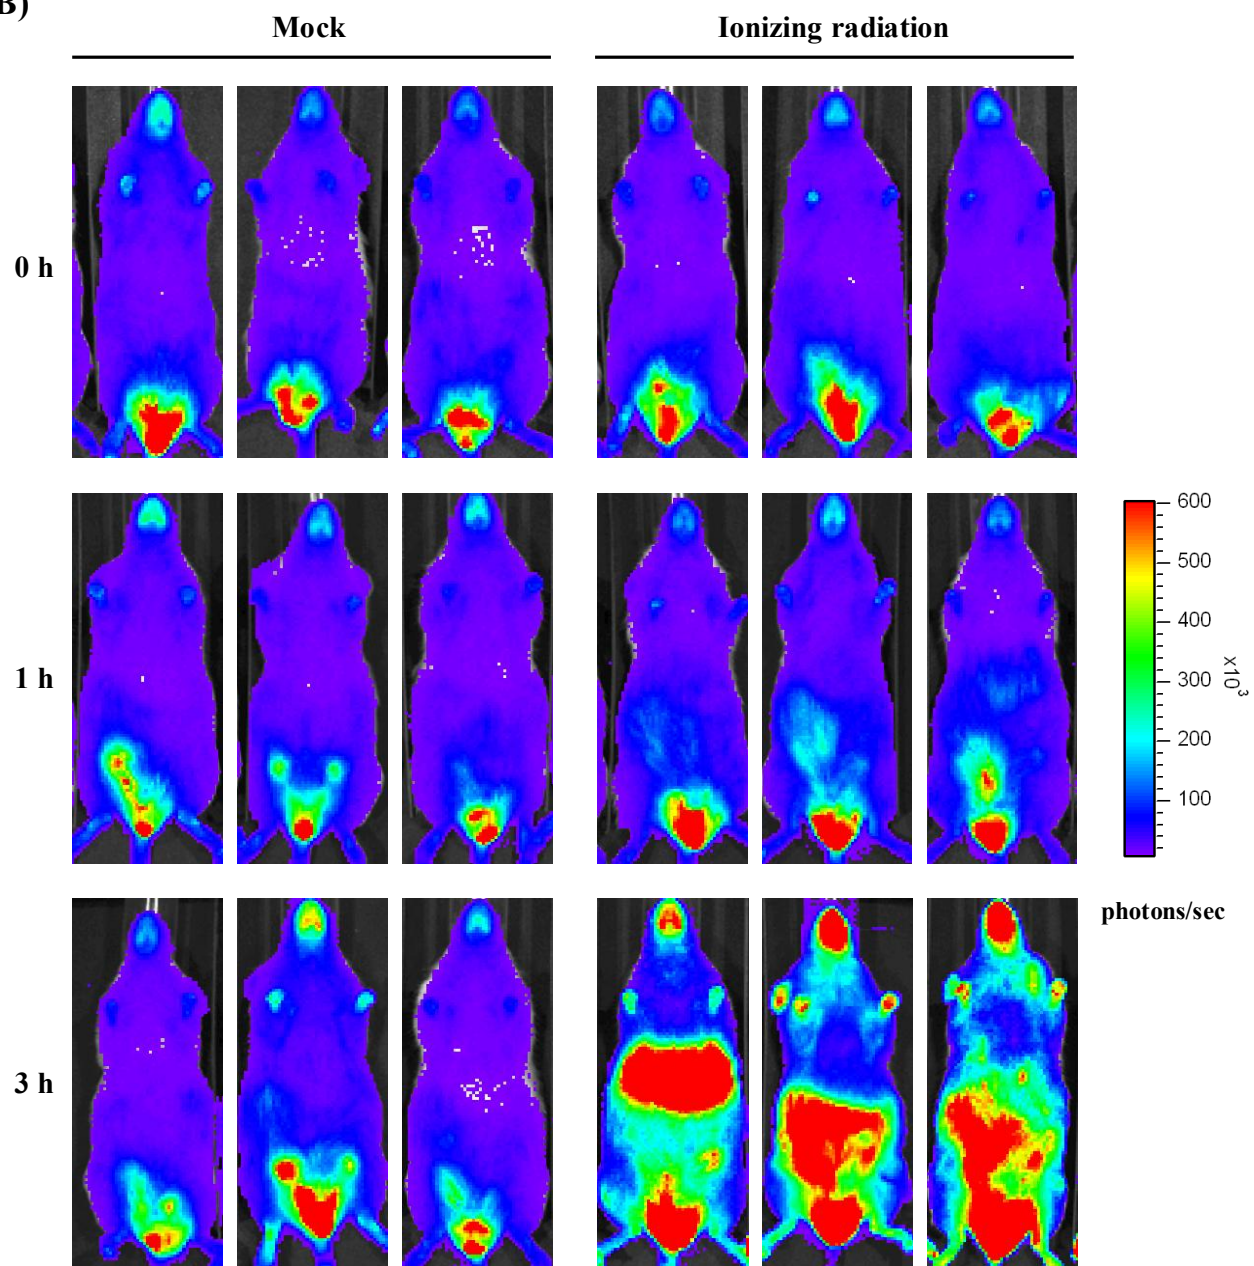

Supplement: S1 (10.1371/journal.pone.0023682.s001) [file journal.pone.0023682.s001]
